# Supplementary material for: The benzyl viologen radical cation: an effective n-dopant for poly(naphthalenediimide-bithiophene)
Source: Royal Society of Chemistry journal article supplement (doi:10.1039/d0ta06315k), 2020-01-01
Supplement: d0ta06315k1.pdf [file d0ta06315k1.pdf]

## Supporting Information

### **Benzyl Viologen Radical Cation as *n*-Dopant for Poly(Naphthalenediimide-Bithiophene)**

Teck Lip Dexter Tam,<sup>\*,†</sup> Ting Ting Lin,<sup>†</sup> Mohamed I. Omer,<sup>‡</sup> Xizu Wang,<sup>†</sup> Jianwei Xu<sup>\*,†,§</sup>

<sup>†</sup> Institute of Materials Research and Engineering (IMRE), Agency of Science, Technology and Research (A\*STAR), 2 Fusionopolis Way, Innovis, Singapore 138634, Singapore.

<sup>‡</sup> School of Electrical and Electronic Engineering, Nanyang Technological University, Block S2.1, 50 Nanyang Avenue, Singapore 639798, Singapore.

<sup>§</sup> Department of Chemistry, National University of Singapore, 3 Science Drive 3, Singapore 117543, Singapore.

#### **General Experimental Methods**

UV-Vis-NIR absorption spectra were recorded on a Shimadzu UV-3101PC UV-VIS-NIR Spectrophotometer. Cyclic voltammetry(CV) experiments were performed using Autolab potentiostat (model PGSTAT30) by Echochimie. CV measurements were recorded in dry acetonitrile with 0.1 M tetra-*n*-butylammonium hexafluorophosphate as supporting electrolyte (scan rate of 100 mV•s<sup>-1</sup>), glassy carbon disk as working electrode, gold disk as counter electrode and Ag/AgCl as reference electrode. Ferrocene was used as external standard (HOMO = oxidation onset = -4.80 eV). Molecular weights of the polymers were determined by Polymer Labs GPC-220 equipped with a refractive index detector using 1,2,4-trichlorobenzene at 150°C as solvent and polystyrenes as standards. The molecular packing of was studied by grazing incidence small and wide angle X-ray diffraction (GISAXS, GIWAXS; Nanoinxider Xenocs). XPS spectra were measured using VG Thermo Escalab 220i-XL X-ray photoelectron spectroscopy system. XPS data is analyzed using Thermo Avantage v4.12. EPR spectra were measured using JEOL FA200 ESR spectrometer.

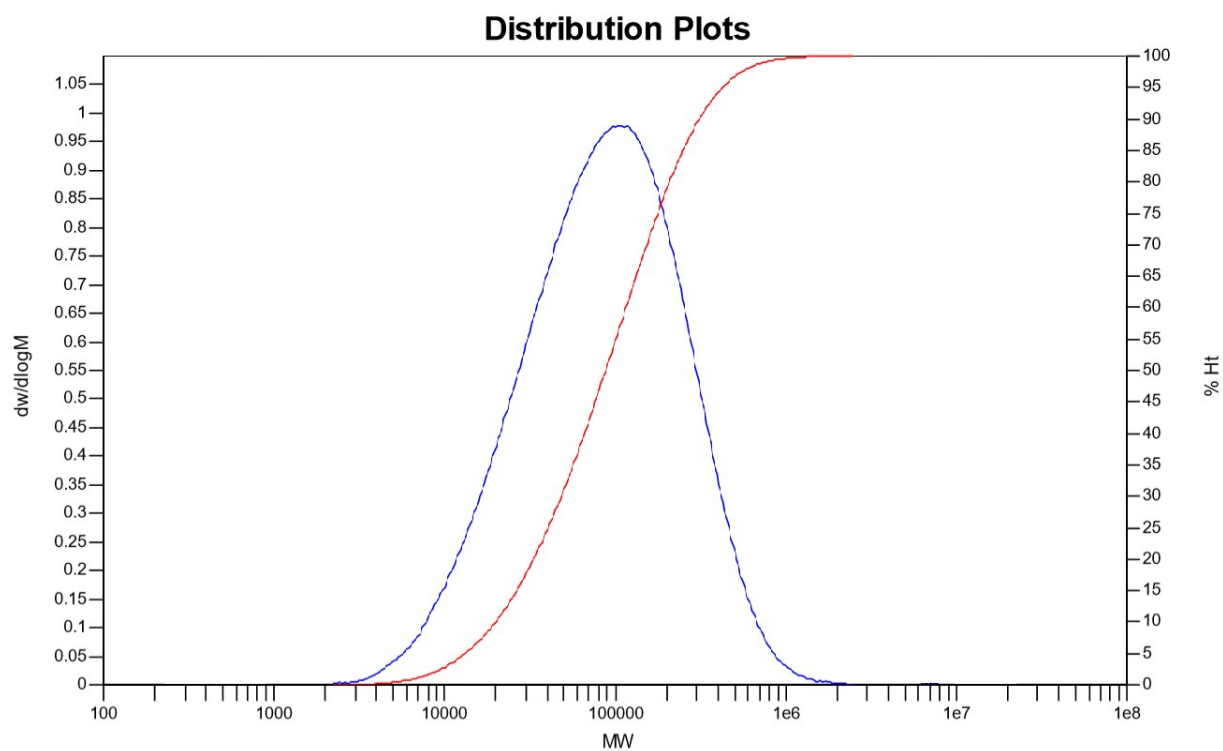

**Figure S1.** GPC traces of pNDI-2T.

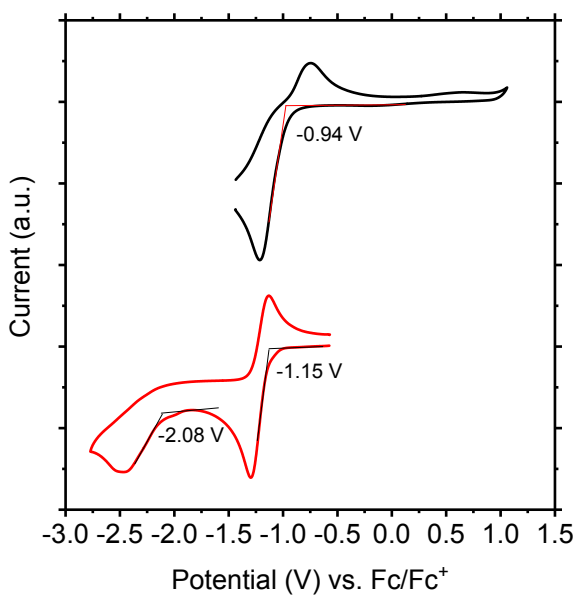

**Figure S2.** Cyclic voltammograms of pNDI-2T film (black) and solution benzyl viologen dichloride (red) in 0.1M tetrabutylammonium hexafluorophosphate in acetonitrile.

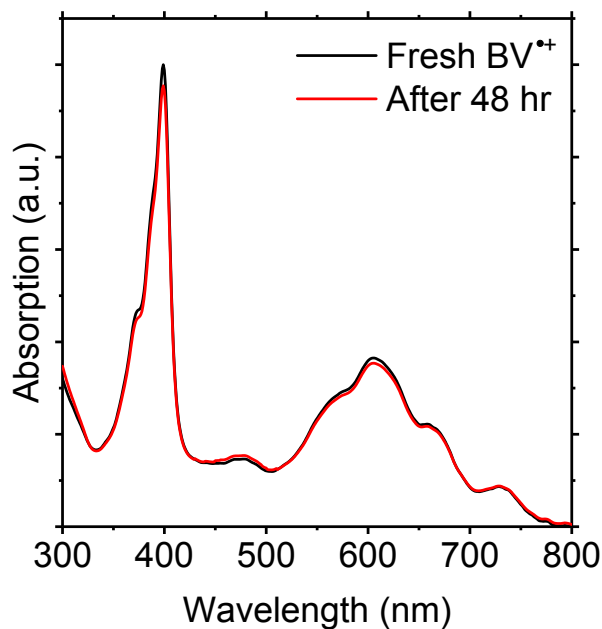

**Figure S3.** Stability of zinc reduced  $BV^{\bullet+}$  solution with excess zinc removed.

| Peak   | Pristine $q_{x,y}$ (Å) | Doped $q_{x,y}$ (Å) | Pristine $q_z$ (Å) | Doped $q_z$ (Å) | Literature (Å) |
|--------|------------------------|---------------------|--------------------|-----------------|----------------|
| (100)  | 24.7                   | 23.7                | 24.3               | 24.3            | 25.5           |
| (001)  | 14.3                   | 14.6                | not observed       | not observed    | 13.9           |
| (001') | 7.3                    | 7.3                 | 7.1                | 7.1             | 7.1            |
| (010)  | 3.91                   | 3.91                | 3.95               | 4.16            | 3.9            |

**Table S1.** Peak position of the first order peaks in the pristine and doped pNDI-2T films, as well as those reported in literature (Adv. Mater., 2010, 22, 4359-4363).

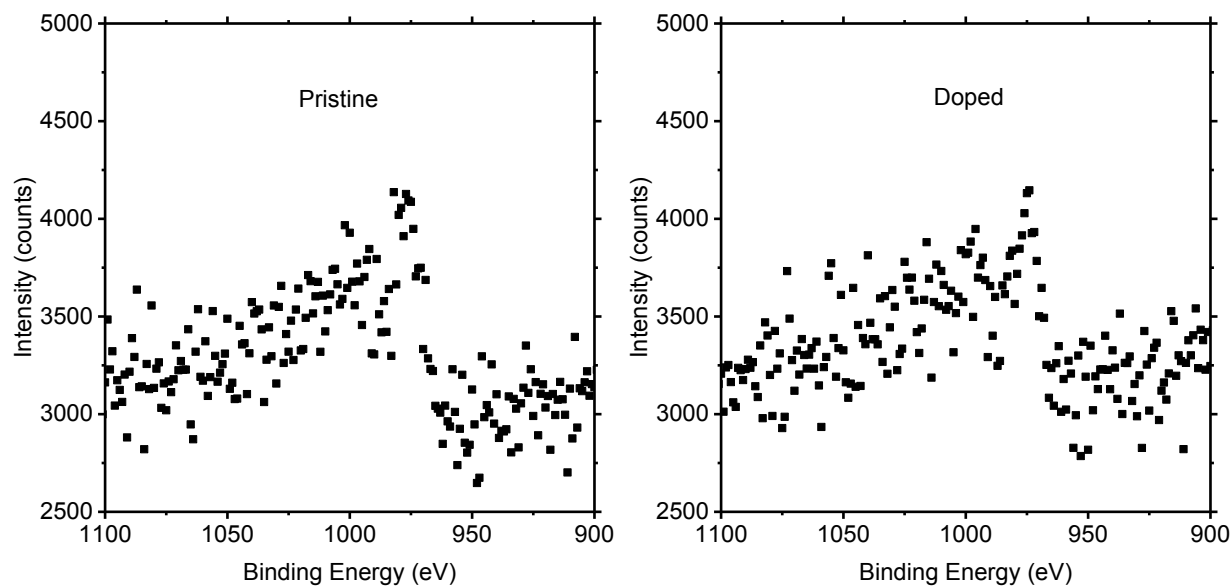

**Figure S4.** XPS binding energy spectra in the region on 1100-900 eV. No significant zinc species were observed in the doped sample.

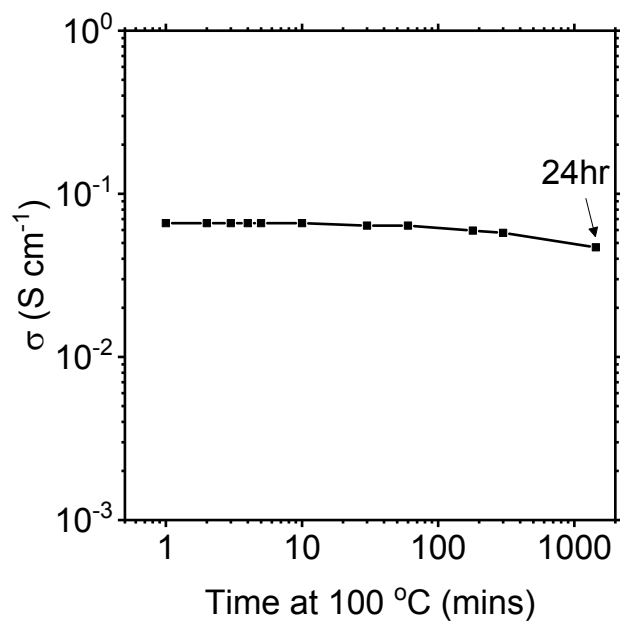

**Fig. S5.** Electrical conductivity stability of  $BV^{\bullet+}$ -doped pNDI-2T film (24 hr immersion) at 100 °C against time.

| pNDI-2T                 | Total Energy (Hartree) | pNDI-2T + BV <sup>•+</sup> | Total Energy (Hartree) |
|-------------------------|------------------------|----------------------------|------------------------|
| $(pNDI - 2T)_0^0$       | -8514.36515600         | $(pNDI - 2T/BV)_{+1}^{+1}$ | -9550.93303040         |
| $(pNDI - 2T)_{-1}^{-1}$ | -8514.44701725         | $(pNDI - 2T/BV)_{+1}^0$    | -9551.07535708         |
| $(pNDI - 2T)_{-1}^{-1}$ | -8514.45523186         | $(pNDI - 2T/BV)_0^0$       | -9551.06985843         |
| $(pNDI - 2T)_{-1}^0$    | -8514.35731448         | $(pNDI - 2T/BV)_0^{+1}$    | -9550.91845293         |
| $\lambda_e$             | 437 meV                | $\lambda_e$                | 247 meV                |

**Table S2.** Tabulation of the total energies of the systems and the calculated reorganization energies. pNDI-2T denotes pair of pNDI-2T dimer. BV denotes benzyl viologen. Superscript denotes the charge of the system at which the calculation was carried out. Subscript denotes the charge of the system at which the geometry was optimized.

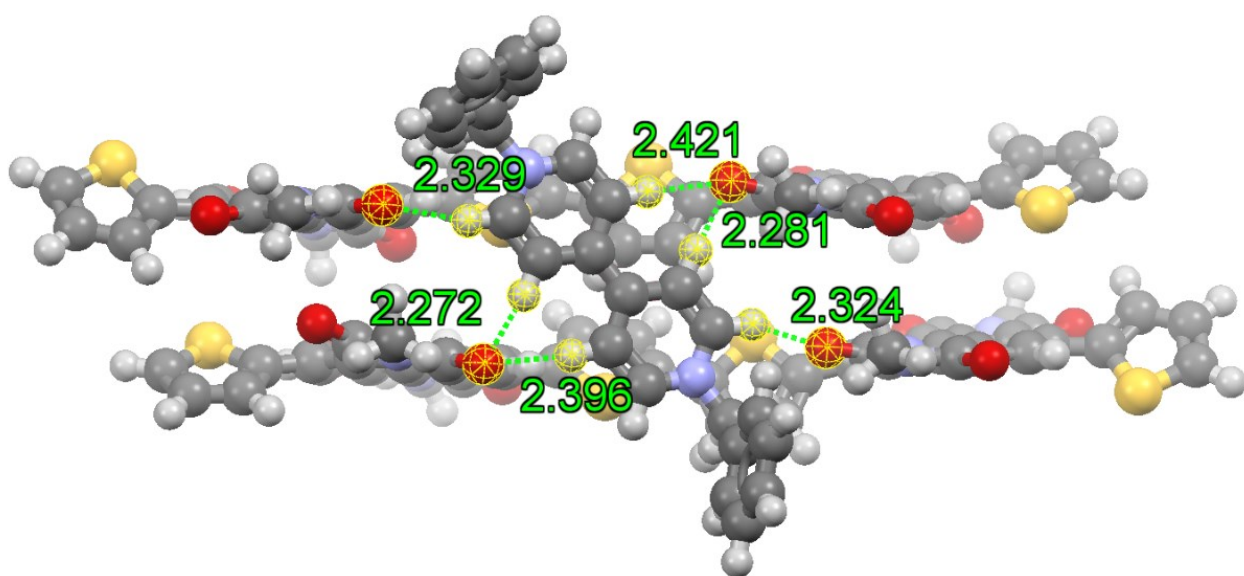

**Figure S6.** Side view of the pair of pNDI-2T with a BV<sup>•+</sup> molecule showing the pseudo-hydrogen bonds between six hydrogens from the bipyridinium of BV<sup>•+</sup> and four oxygens from the NDI moieties.

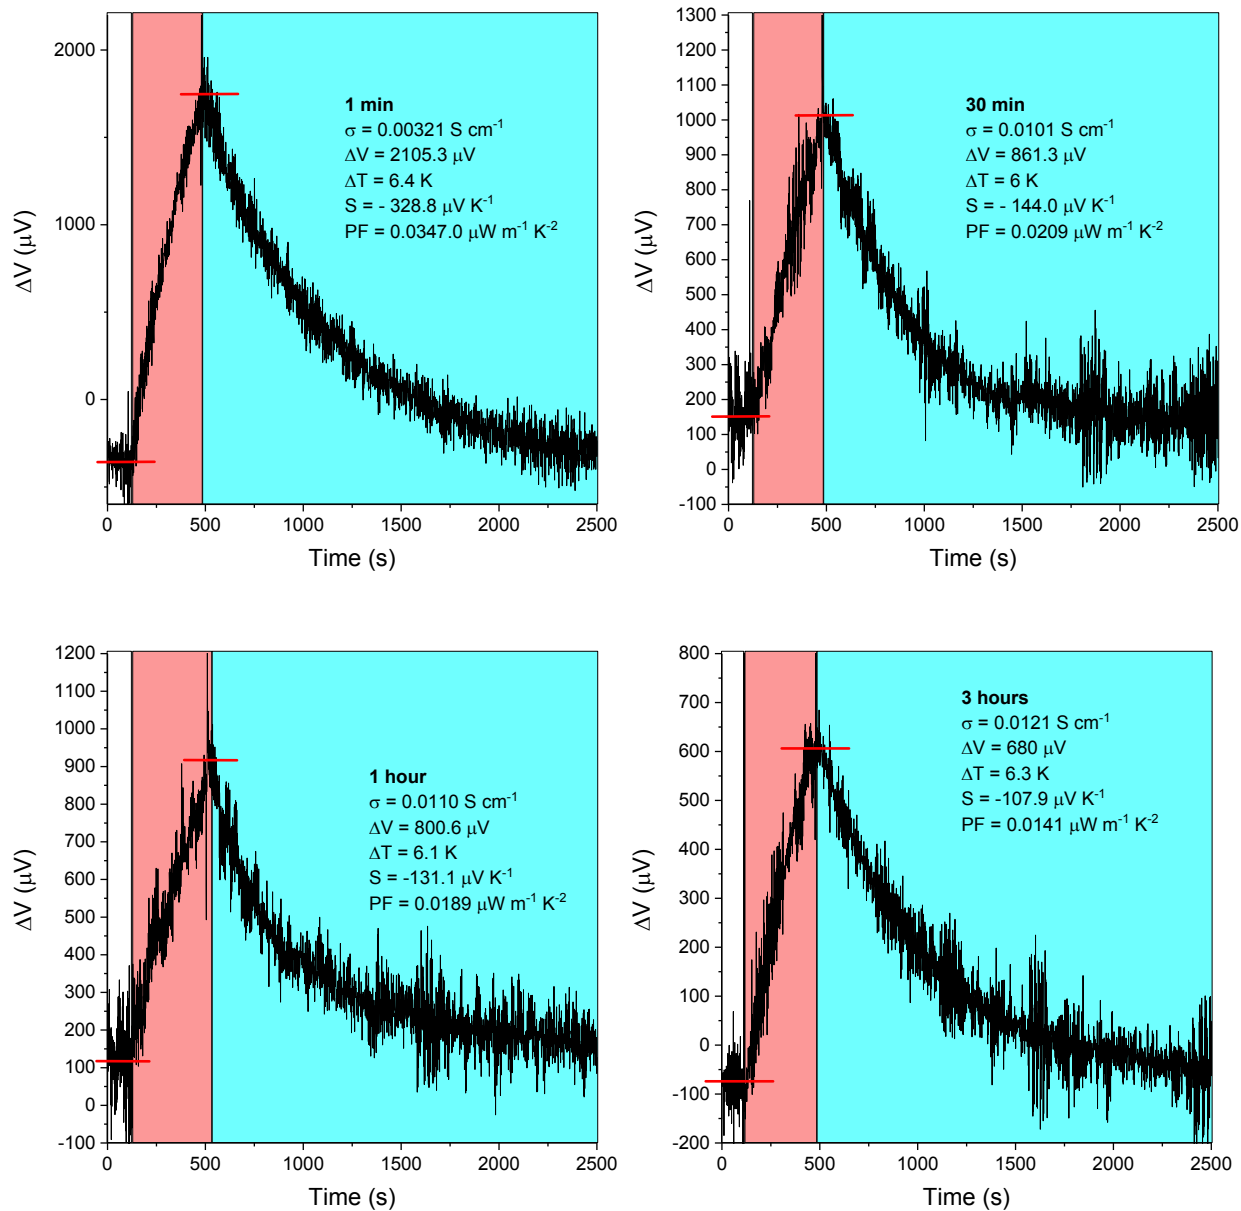

**Figure S7.** Representative thermovoltage measurements against time. All samples were held at RT for about 100 s before heating. White region: holding at RT. Pink region: heating. Blue region: natural cooling.

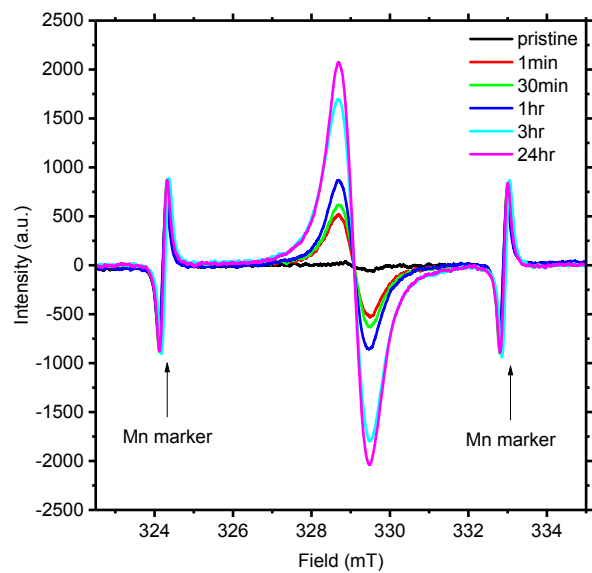

**Fig. S8.** Solid-state EPR spectra of the pristine and  $BV^{\bullet+}$ -doped pNDI-2T. The  $g$ -values are all about 2.004.

### Coordinates for pair of pNDI-2T dimer

| Center Number | Atomic Number | Atomic Type | Coordinates (Angstroms) |           |           |
|---------------|---------------|-------------|-------------------------|-----------|-----------|
|               |               |             | X                       | Y         | Z         |
| 1             | 6             | 0           | -6.511640               | -1.602109 | 1.385664  |
| 2             | 6             | 0           | -7.834811               | -1.905776 | 1.213852  |
| 3             | 6             | 0           | -6.054203               | -0.286004 | 1.648718  |
| 4             | 6             | 0           | -8.830807               | -0.917191 | 1.371748  |
| 5             | 6             | 0           | -8.193347               | -3.309216 | 0.904044  |
| 6             | 6             | 0           | -7.011930               | 0.730351  | 1.688964  |
| 7             | 6             | 0           | -10.213176              | -1.239905 | 1.283655  |
| 8             | 6             | 0           | -8.392468               | 0.399523  | 1.632390  |
| 9             | 7             | 0           | -9.544095               | -3.593337 | 0.865592  |
| 10            | 8             | 0           | -7.345384               | -4.162964 | 0.705877  |
| 11            | 6             | 0           | -6.660894               | 2.182332  | 1.657133  |
| 12            | 6             | 0           | -10.578432              | -2.655715 | 0.977566  |
| 13            | 6             | 0           | -11.169816              | -0.250639 | 1.521642  |
| 14            | 6             | 0           | -9.379213               | 1.380740  | 1.868890  |
| 15            | 6             | 0           | -9.955372               | -4.958045 | 0.544111  |
| 16            | 7             | 0           | -7.652506               | 3.092324  | 2.018181  |
| 17            | 8             | 0           | -5.570673               | 2.596771  | 1.305809  |
| 18            | 8             | 0           | -11.718982              | -3.043141 | 0.831927  |
| 19            | 6             | 0           | -10.706176              | 1.052614  | 1.838694  |
| 20            | 6             | 0           | -9.003735               | 2.785649  | 2.153532  |
| 21            | 1             | 0           | -10.731805              | -5.274159 | 1.238827  |
| 22            | 1             | 0           | -10.359253              | -4.996190 | -0.469354 |
| 23            | 1             | 0           | -9.078965               | -5.594591 | 0.621457  |
| 24            | 6             | 0           | -7.270322               | 4.504571  | 2.078294  |
| 25            | 8             | 0           | -9.821679               | 3.633311  | 2.450702  |
| 26            | 1             | 0           | -6.279477               | 4.581737  | 2.521207  |
| 27            | 1             | 0           | -7.250188               | 4.930988  | 1.073121  |
| 28            | 1             | 0           | -8.010668               | 5.021848  | 2.682364  |
| 29            | 1             | 0           | -5.804645               | -2.421741 | 1.326902  |
| 30            | 1             | 0           | -11.422390              | 1.842369  | 2.031102  |
| 31            | 6             | 0           | -4.622869               | -0.116972 | 1.928800  |
| 32            | 6             | 0           | -4.007619               | 0.703005  | 2.836418  |
| 33            | 16            | 0           | -3.448427               | -1.154597 | 1.167038  |
| 34            | 6             | 0           | -2.607783               | 0.524458  | 2.905735  |
| 35            | 1             | 0           | -4.543333               | 1.424531  | 3.437489  |
| 36            | 6             | 0           | -2.139312               | -0.441796 | 2.050234  |
| 37            | 1             | 0           | -1.962396               | 1.102142  | 3.556373  |
| 38            | 6             | 0           | -12.637127              | -0.402388 | 1.466884  |
| 39            | 6             | 0           | -13.438661              | -0.880374 | 0.469243  |
| 40            | 16            | 0           | -13.605760              | 0.247519  | 2.763766  |
| 41            | 6             | 0           | -14.825120              | -0.732492 | 0.742348  |
| 42            | 1             | 0           | -13.044425              | -1.330995 | -0.430240 |
| 43            | 6             | 0           | -15.065740              | -0.147886 | 1.948315  |
| 44            | 1             | 0           | -16.019066              | 0.059484  | 2.412653  |
| 45            | 1             | 0           | -15.608771              | -1.058693 | 0.069952  |
| 46            | 6             | 0           | -0.770964               | -0.846003 | 1.795092  |
| 47            | 16            | 0           | 0.535547                | -0.276150 | 2.783894  |
| 48            | 6             | 0           | -0.296463               | -1.647339 | 0.788174  |
| 49            | 6             | 0           | 1.720925                | -1.120170 | 1.820376  |
| 50            | 6             | 0           | 1.107339                | -1.799944 | 0.804431  |
| 51            | 1             | 0           | -0.934945               | -2.097779 | 0.037833  |
| 52            | 6             | 0           | 3.156571                | -0.902273 | 2.058676  |
| 53            | 1             | 0           | 1.652711                | -2.383402 | 0.077083  |
| 54            | 6             | 0           | 4.171673                | -1.856155 | 1.943423  |
| 55            | 6             | 0           | 3.539404                | 0.430893  | 2.358202  |
| 56            | 6             | 0           | 5.530828                | -1.453881 | 2.052299  |
| 57            | 6             | 0           | 3.890069                | -3.314298 | 1.783060  |
| 58            | 6             | 0           | 4.844680                | 0.823963  | 2.456697  |



|     |    |   |           |           |           |
|-----|----|---|-----------|-----------|-----------|
| 59  | 1  | 0 | 2.781092  | 1.195663  | 2.474797  |
| 60  | 6  | 0 | 6.583409  | -2.384960 | 1.914922  |
| 61  | 6  | 0 | 5.890394  | -0.107744 | 2.282034  |
| 62  | 7  | 0 | 4.977489  | -4.180400 | 1.622827  |
| 63  | 8  | 0 | 2.775193  | -3.793900 | 1.802656  |
| 64  | 6  | 0 | 5.131353  | 2.255337  | 2.712574  |
| 65  | 6  | 0 | 7.886222  | -2.001464 | 2.085568  |
| 66  | 6  | 0 | 6.307560  | -3.806870 | 1.606150  |
| 67  | 6  | 0 | 7.248721  | 0.300353  | 2.360814  |
| 68  | 6  | 0 | 4.643590  | -5.585129 | 1.398445  |
| 69  | 7  | 0 | 6.467681  | 2.631084  | 2.626035  |
| 70  | 8  | 0 | 4.253257  | 3.062633  | 2.946999  |
| 71  | 6  | 0 | 8.262799  | -0.659519 | 2.342873  |
| 72  | 1  | 0 | 8.643950  | -2.774480 | 2.029358  |
| 73  | 8  | 0 | 7.201557  | -4.602297 | 1.371549  |
| 74  | 6  | 0 | 7.522705  | 1.769188  | 2.328553  |
| 75  | 1  | 0 | 4.002253  | -5.940313 | 2.204207  |
| 76  | 1  | 0 | 4.104398  | -5.693079 | 0.455820  |
| 77  | 1  | 0 | 5.573732  | -6.144639 | 1.366854  |
| 78  | 6  | 0 | 6.782834  | 4.060729  | 2.674988  |
| 79  | 6  | 0 | 9.680586  | -0.407014 | 2.640655  |
| 80  | 8  | 0 | 8.604887  | 2.240321  | 2.030546  |
| 81  | 1  | 0 | 7.690670  | 4.204137  | 3.258862  |
| 82  | 1  | 0 | 6.943474  | 4.443385  | 1.665313  |
| 83  | 1  | 0 | 5.939720  | 4.566257  | 3.137077  |
| 84  | 6  | 0 | 10.226022 | 0.419977  | 3.584242  |
| 85  | 16 | 0 | 10.930811 | -1.335746 | 1.860882  |
| 86  | 6  | 0 | 11.638371 | 0.320771  | 3.675096  |
| 87  | 1  | 0 | 9.633402  | 1.083656  | 4.198845  |
| 88  | 6  | 0 | 12.156875 | -0.585991 | 2.799760  |
| 89  | 1  | 0 | 12.240229 | 0.898834  | 4.364886  |
| 90  | 1  | 0 | 13.192638 | -0.851620 | 2.644840  |
| 91  | 6  | 0 | -3.539408 | -0.428356 | -2.358195 |
| 92  | 6  | 0 | -4.844651 | -0.821241 | -2.457577 |
| 93  | 6  | 0 | -3.156510 | 0.904316  | -2.056422 |
| 94  | 6  | 0 | -5.890382 | 0.110210  | -2.281659 |
| 95  | 6  | 0 | -5.131292 | -2.252170 | -2.715978 |
| 96  | 6  | 0 | -4.171651 | 1.858036  | -1.939733 |
| 97  | 6  | 0 | -7.248686 | -0.297738 | -2.361473 |
| 98  | 6  | 0 | -5.530808 | 1.455954  | -2.049641 |
| 99  | 7  | 0 | -6.467636 | -2.628047 | -2.630286 |
| 100 | 8  | 0 | -4.253180 | -3.059059 | -2.951738 |
| 101 | 6  | 0 | -3.890142 | 3.315884  | -1.776629 |
| 102 | 6  | 0 | -7.522699 | -1.766613 | -2.331632 |
| 103 | 6  | 0 | -8.262759 | 0.662125  | -2.342307 |
| 104 | 6  | 0 | -6.583426 | 2.386828  | -1.911157 |
| 105 | 6  | 0 | -6.782785 | -4.057604 | -2.681641 |
| 106 | 7  | 0 | -4.977626 | 4.181815  | -1.615950 |
| 107 | 8  | 0 | -2.775230 | 3.795490  | -1.794349 |
| 108 | 8  | 0 | -8.604959 | -2.238197 | -2.034605 |
| 109 | 6  | 0 | -7.886207 | 2.003636  | -2.082791 |
| 110 | 6  | 0 | -6.307698 | 3.808284  | -1.600263 |
| 111 | 1  | 0 | -6.943497 | -4.441909 | -1.672603 |
| 112 | 1  | 0 | -7.690561 | -4.200050 | -3.265838 |
| 113 | 1  | 0 | -5.939619 | -4.562366 | -3.144478 |
| 114 | 6  | 0 | -4.643791 | 5.586159  | -1.389080 |
| 115 | 8  | 0 | -7.201774 | 4.603376  | -1.364810 |
| 116 | 1  | 0 | -4.105440 | 5.692596  | -0.445803 |
| 117 | 1  | 0 | -4.001704 | 5.942520  | -2.193721 |
| 118 | 1  | 0 | -5.573906 | 6.145710  | -1.357467 |
| 119 | 1  | 0 | -2.781137 | -1.192986 | -2.475935 |
| 120 | 1  | 0 | -8.643906 | 2.776612  | -2.025645 |
| 121 | 6  | 0 | -1.720793 | 1.121571  | -1.817894 |

|     |    |   |            |           |           |
|-----|----|---|------------|-----------|-----------|
| 122 | 6  | 0 | -1.106730  | 1.800293  | -0.801510 |
| 123 | 16 | 0 | -0.535836  | 0.277622  | -2.782095 |
| 124 | 6  | 0 | 0.296985   | 1.646877  | -0.785407 |
| 125 | 1  | 0 | -1.651684  | 2.383539  | -0.073708 |
| 126 | 6  | 0 | 0.770973   | 0.845972  | -1.792911 |
| 127 | 1  | 0 | 0.935729   | 2.096367  | -0.034725 |
| 128 | 6  | 0 | -9.680456  | 0.410119  | -2.640927 |
| 129 | 6  | 0 | -10.225623 | -0.415518 | -3.585850 |
| 130 | 16 | 0 | -10.930900 | 1.337882  | -1.860316 |
| 131 | 6  | 0 | -11.637934 | -0.316054 | -3.677093 |
| 132 | 1  | 0 | -9.632852  | -1.078393 | -4.201172 |
| 133 | 6  | 0 | -12.156676 | 0.589544  | -2.800700 |
| 134 | 1  | 0 | -13.192476 | 0.855044  | -2.645808 |
| 135 | 1  | 0 | -12.239588 | -0.893120 | -4.367895 |
| 136 | 6  | 0 | 2.139061   | 0.441012  | -2.048270 |
| 137 | 16 | 0 | 3.448944   | 1.154899  | -1.167129 |
| 138 | 6  | 0 | 2.606660   | -0.526885 | -2.902397 |
| 139 | 6  | 0 | 4.622561   | 0.115444  | -1.927716 |
| 140 | 6  | 0 | 4.006461   | -0.705832 | -2.833594 |
| 141 | 1  | 0 | 1.960640   | -1.105520 | -3.551558 |
| 142 | 6  | 0 | 6.054112   | 0.284429  | -1.648718 |
| 143 | 1  | 0 | 4.541530   | -1.428675 | -3.433649 |
| 144 | 6  | 0 | 7.011553   | -0.732246 | -1.687985 |
| 145 | 6  | 0 | 6.512069   | 1.600798  | -1.387881 |
| 146 | 6  | 0 | 8.392215   | -0.401705 | -1.632625 |
| 147 | 6  | 0 | 6.660172   | -2.184097 | -1.653907 |
| 148 | 6  | 0 | 7.835408   | 1.904368  | -1.217235 |
| 149 | 1  | 0 | 5.805355   | 2.420733  | -1.329969 |
| 150 | 6  | 0 | 9.378583   | -1.383529 | -1.868181 |
| 151 | 6  | 0 | 8.831053   | 0.915285  | -1.374189 |
| 152 | 7  | 0 | 7.651361   | -3.094854 | -2.014233 |
| 153 | 8  | 0 | 5.570036   | -2.597791 | -1.301453 |
| 154 | 6  | 0 | 8.194459   | 3.308193  | -0.909747 |
| 155 | 6  | 0 | 10.705654  | -1.055736 | -1.839060 |
| 156 | 6  | 0 | 9.002604   | -2.788737 | -2.150656 |
| 157 | 6  | 0 | 10.213548  | 1.237759  | -1.287302 |
| 158 | 6  | 0 | 7.268752   | -4.507065 | -2.072272 |
| 159 | 7  | 0 | 9.545314   | 3.591966  | -0.872214 |
| 160 | 8  | 0 | 7.346803   | 4.162491  | -0.712641 |
| 161 | 6  | 0 | 11.169800  | 0.247846  | -1.524147 |
| 162 | 1  | 0 | 11.421559  | -1.845977 | -2.030634 |
| 163 | 8  | 0 | 9.820178   | -3.637029 | -2.447046 |
| 164 | 6  | 0 | 10.579358  | 2.653998  | -0.983852 |
| 165 | 1  | 0 | 7.248950   | -4.932158 | -1.066531 |
| 166 | 1  | 0 | 6.277684   | -4.584555 | -2.514634 |
| 167 | 1  | 0 | 8.008676   | -5.025365 | -2.675983 |
| 168 | 6  | 0 | 9.957263   | 4.957068  | -0.553273 |
| 169 | 6  | 0 | 12.637164  | 0.399238  | -1.469980 |
| 170 | 8  | 0 | 11.720121  | 3.041487  | -0.840025 |
| 171 | 1  | 0 | 10.364092  | 4.996236  | 0.458956  |
| 172 | 1  | 0 | 10.731634  | 5.272747  | -1.250514 |
| 173 | 1  | 0 | 9.080509   | 5.593351  | -0.628789 |
| 174 | 6  | 0 | 13.438972  | 0.878524  | -0.473186 |
| 175 | 16 | 0 | 13.605402  | -0.252860 | -2.766025 |
| 176 | 6  | 0 | 14.825348  | 0.729889  | -0.746288 |
| 177 | 1  | 0 | 13.044985  | 1.330574  | 0.425692  |
| 178 | 6  | 0 | 15.065619  | 0.143395  | -1.951411 |
| 179 | 1  | 0 | 15.609190  | 1.056909  | -0.074515 |
| 180 | 1  | 0 | 16.018815  | -0.064928 | -2.415588 |

Coordinates for pair of pNDI-2T dimers with BV<sup>•+</sup>

| Center<br>Number | Atomic<br>Number | Atomic<br>Type | Coordinates (Angstroms) |           |           |
|------------------|------------------|----------------|-------------------------|-----------|-----------|
|                  |                  |                | X                       | Y         | Z         |
| 1                | 6                | 0              | -6.254926               | 0.274596  | -1.579345 |
| 2                | 6                | 0              | -7.523235               | 0.759614  | -1.400542 |
| 3                | 6                | 0              | -5.956975               | -1.108509 | -1.629689 |
| 4                | 6                | 0              | -8.624588               | -0.121653 | -1.327663 |
| 5                | 6                | 0              | -7.712710               | 2.225238  | -1.338300 |
| 6                | 6                | 0              | -7.017483               | -1.998115 | -1.460289 |
| 7                | 6                | 0              | -9.956159               | 0.363662  | -1.210486 |
| 8                | 6                | 0              | -8.345807               | -1.504396 | -1.391828 |
| 9                | 7                | 0              | -9.006276               | 2.662376  | -1.230072 |
| 10               | 8                | 0              | -6.761689               | 3.004145  | -1.387528 |
| 11               | 6                | 0              | -6.813985               | -3.459537 | -1.212910 |
| 12               | 6                | 0              | -10.140935              | 1.834600  | -1.084854 |
| 13               | 6                | 0              | -11.027448              | -0.533781 | -1.252391 |
| 14               | 6                | 0              | -9.442532               | -2.393335 | -1.419761 |
| 15               | 6                | 0              | -9.264190               | 4.095346  | -1.096073 |
| 16               | 7                | 0              | -7.915328               | -4.295823 | -1.352084 |
| 17               | 8                | 0              | -5.741855               | -3.924757 | -0.872309 |
| 18               | 8                | 0              | -11.203590              | 2.376887  | -0.877608 |
| 19               | 6                | 0              | -10.721834              | -1.915946 | -1.387986 |
| 20               | 6                | 0              | -9.233845               | -3.861941 | -1.477605 |
| 21               | 1                | 0              | -10.046177              | 4.390310  | -1.794028 |
| 22               | 1                | 0              | -9.604688               | 4.314000  | -0.082833 |
| 23               | 1                | 0              | -8.339970               | 4.624240  | -1.305134 |
| 24               | 6                | 0              | -7.678955               | -5.732761 | -1.186962 |
| 25               | 8                | 0              | -10.155495              | -4.643380 | -1.586671 |
| 26               | 1                | 0              | -6.784891               | -6.010972 | -1.742277 |
| 27               | 1                | 0              | -7.533264               | -5.967076 | -0.130860 |
| 28               | 1                | 0              | -8.551357               | -6.255450 | -1.568507 |
| 29               | 1                | 0              | -5.454763               | 0.994687  | -1.694905 |
| 30               | 1                | 0              | -11.527615              | -2.639224 | -1.422231 |
| 31               | 6                | 0              | -4.563426               | -1.474438 | -1.923990 |
| 32               | 6                | 0              | -4.062622               | -2.444713 | -2.748216 |
| 33               | 16               | 0              | -3.272509               | -0.481812 | -1.311012 |
| 34               | 6                | 0              | -2.651871               | -2.408818 | -2.877092 |
| 35               | 1                | 0              | -4.685565               | -3.174749 | -3.246887 |
| 36               | 6                | 0              | -2.067236               | -1.406635 | -2.147346 |
| 37               | 1                | 0              | -2.086017               | -3.114189 | -3.473712 |
| 38               | 6                | 0              | -12.462794              | -0.212466 | -1.165483 |
| 39               | 6                | 0              | -13.156370              | 0.518367  | -0.240053 |
| 40               | 16               | 0              | -13.564900              | -0.973839 | -2.285144 |
| 41               | 6                | 0              | -14.562847              | 0.474097  | -0.428901 |
| 42               | 1                | 0              | -12.671861              | 1.069058  | 0.552550  |
| 43               | 6                | 0              | -14.926987              | -0.283585 | -1.500596 |
| 44               | 1                | 0              | -15.920715              | -0.462159 | -1.885752 |
| 45               | 1                | 0              | -15.271626              | 0.994770  | 0.202527  |
| 46               | 6                | 0              | -0.670395               | -1.060067 | -1.968030 |
| 47               | 16               | 0              | 0.561926                | -1.479857 | -3.121728 |
| 48               | 6                | 0              | -0.132300               | -0.365463 | -0.917368 |
| 49               | 6                | 0              | 1.793691                | -0.708489 | -2.166751 |
| 50               | 6                | 0              | 1.260734                | -0.170716 | -1.031435 |
| 51               | 1                | 0              | -0.714757               | -0.035666 | -0.066683 |
| 52               | 6                | 0              | 3.227504                | -0.786478 | -2.483206 |
| 53               | 1                | 0              | 1.860711                | 0.328144  | -0.284057 |
| 54               | 6                | 0              | 4.091595                | 0.308851  | -2.464656 |
| 55               | 6                | 0              | 3.781100                | -2.074305 | -2.671917 |
| 56               | 6                | 0              | 5.493077                | 0.095909  | -2.524190 |
| 57               | 6                | 0              | 3.599481                | 1.717048  | -2.460273 |
| 58               | 6                | 0              | 5.133186                | -2.282385 | -2.745827 |

|     |    |   |           |           |           |
|-----|----|---|-----------|-----------|-----------|
| 59  | 1  | 0 | 3.131131  | -2.940791 | -2.715428 |
| 60  | 6  | 0 | 6.401485  | 1.170965  | -2.416135 |
| 61  | 6  | 0 | 6.036359  | -1.200893 | -2.649462 |
| 62  | 7  | 0 | 4.539684  | 2.731094  | -2.281685 |
| 63  | 8  | 0 | 2.429530  | 2.026543  | -2.613688 |
| 64  | 6  | 0 | 5.625096  | -3.676426 | -2.882518 |
| 65  | 6  | 0 | 7.746366  | 0.966662  | -2.557439 |
| 66  | 6  | 0 | 5.914042  | 2.542079  | -2.157268 |
| 67  | 6  | 0 | 7.440539  | -1.415714 | -2.699817 |
| 68  | 6  | 0 | 4.031727  | 4.101440  | -2.231735 |
| 69  | 7  | 0 | 6.998997  | -3.849862 | -2.763540 |
| 70  | 8  | 0 | 4.868712  | -4.611918 | -3.047900 |
| 71  | 6  | 0 | 8.309675  | -0.321707 | -2.755547 |
| 72  | 1  | 0 | 8.390347  | 1.838133  | -2.528004 |
| 73  | 8  | 0 | 6.657969  | 3.461670  | -1.873274 |
| 74  | 6  | 0 | 7.918889  | -2.825035 | -2.551798 |
| 75  | 1  | 0 | 3.345302  | 4.260219  | -3.061707 |
| 76  | 1  | 0 | 3.497181  | 4.281652  | -1.296379 |
| 77  | 1  | 0 | 4.882964  | 4.773059  | -2.296180 |
| 78  | 6  | 0 | 7.512955  | -5.220075 | -2.677671 |
| 79  | 6  | 0 | 9.742387  | -0.381101 | -3.068819 |
| 80  | 8  | 0 | 9.056899  | -3.106618 | -2.225376 |
| 81  | 1  | 0 | 8.429506  | -5.293711 | -3.260676 |
| 82  | 1  | 0 | 7.727423  | -5.468687 | -1.636658 |
| 83  | 1  | 0 | 6.748874  | -5.882892 | -3.073258 |
| 84  | 6  | 0 | 10.399106 | -1.217715 | -3.931767 |
| 85  | 16 | 0 | 10.837668 | 0.832356  | -2.461381 |
| 86  | 6  | 0 | 11.770326 | -0.898219 | -4.096769 |
| 87  | 1  | 0 | 9.915586  | -2.039835 | -4.440674 |
| 88  | 6  | 0 | 12.147733 | 0.183884  | -3.358712 |
| 89  | 1  | 0 | 12.444905 | -1.449343 | -4.739344 |
| 90  | 1  | 0 | 13.127238 | 0.633643  | -3.282314 |
| 91  | 6  | 0 | -3.231480 | -0.326112 | 2.446653  |
| 92  | 6  | 0 | -4.515898 | 0.146312  | 2.462165  |
| 93  | 6  | 0 | -2.914902 | -1.707788 | 2.389116  |
| 94  | 6  | 0 | -5.608761 | -0.746834 | 2.428592  |
| 95  | 6  | 0 | -4.733810 | 1.609242  | 2.481029  |
| 96  | 6  | 0 | -3.981216 | -2.612882 | 2.411290  |
| 97  | 6  | 0 | -6.946519 | -0.267268 | 2.426023  |
| 98  | 6  | 0 | -5.316978 | -2.128436 | 2.420300  |
| 99  | 7  | 0 | -6.042333 | 2.031487  | 2.330755  |
| 100 | 8  | 0 | -3.814552 | 2.409268  | 2.583712  |
| 101 | 6  | 0 | -3.781216 | -4.093903 | 2.505409  |
| 102 | 6  | 0 | -7.143299 | 1.181427  | 2.148655  |
| 103 | 6  | 0 | -8.009023 | -1.166135 | 2.557169  |
| 104 | 6  | 0 | -6.416428 | -3.016354 | 2.406711  |
| 105 | 6  | 0 | -6.297353 | 3.463882  | 2.170955  |
| 106 | 7  | 0 | -4.906046 | -4.917685 | 2.419366  |
| 107 | 8  | 0 | -2.696212 | -4.613738 | 2.662592  |
| 108 | 8  | 0 | -8.185767 | 1.661621  | 1.746635  |
| 109 | 6  | 0 | -7.697922 | -2.549358 | 2.505315  |
| 110 | 6  | 0 | -6.213781 | -4.482380 | 2.314801  |
| 111 | 1  | 0 | -6.416439 | 3.710488  | 1.113447  |
| 112 | 1  | 0 | -7.216785 | 3.720903  | 2.693569  |
| 113 | 1  | 0 | -5.452406 | 4.002012  | 2.590593  |
| 114 | 6  | 0 | -4.645890 | -6.357342 | 2.428774  |
| 115 | 8  | 0 | -7.147469 | -5.252039 | 2.179999  |
| 116 | 1  | 0 | -4.055417 | -6.632436 | 1.553832  |
| 117 | 1  | 0 | -4.083033 | -6.621094 | 3.323496  |
| 118 | 1  | 0 | -5.604973 | -6.866058 | 2.411835  |
| 119 | 1  | 0 | -2.432817 | 0.405733  | 2.445652  |
| 120 | 1  | 0 | -8.491776 | -3.285501 | 2.560019  |
| 121 | 6  | 0 | -1.485508 | -2.034427 | 2.237984  |

|     |    |   |            |           |           |
|-----|----|---|------------|-----------|-----------|
| 122 | 6  | 0 | -0.879643  | -2.941215 | 1.412497  |
| 123 | 16 | 0 | -0.279375  | -1.054291 | 3.036843  |
| 124 | 6  | 0 | 0.532305   | -2.865962 | 1.421721  |
| 125 | 1  | 0 | -1.431338  | -3.649837 | 0.812834  |
| 126 | 6  | 0 | 1.021197   | -1.895547 | 2.255765  |
| 127 | 1  | 0 | 1.169561   | -3.514555 | 0.833128  |
| 128 | 6  | 0 | -9.405327  | -0.799263 | 2.819590  |
| 129 | 6  | 0 | -9.893772  | 0.222814  | 3.589913  |
| 130 | 16 | 0 | -10.712401 | -1.814411 | 2.273172  |
| 131 | 6  | 0 | -11.304130 | 0.202680  | 3.729405  |
| 132 | 1  | 0 | -9.261669  | 0.967448  | 4.053825  |
| 133 | 6  | 0 | -11.879950 | -0.839509 | 3.064995  |
| 134 | 1  | 0 | -12.928995 | -1.087227 | 2.989358  |
| 135 | 1  | 0 | -11.864541 | 0.929065  | 4.303967  |
| 136 | 6  | 0 | 2.402188   | -1.503279 | 2.473720  |
| 137 | 16 | 0 | 3.590054   | -1.751728 | 1.228877  |
| 138 | 6  | 0 | 2.967493   | -0.882875 | 3.557038  |
| 139 | 6  | 0 | 4.835053   | -1.007072 | 2.176555  |
| 140 | 6  | 0 | 4.347656   | -0.601968 | 3.386416  |
| 141 | 1  | 0 | 2.415408   | -0.671185 | 4.465272  |
| 142 | 6  | 0 | 6.231775   | -0.984537 | 1.706875  |
| 143 | 1  | 0 | 4.968621   | -0.138543 | 4.143183  |
| 144 | 6  | 0 | 7.016363   | 0.162768  | 1.615840  |
| 145 | 6  | 0 | 6.830635   | -2.228343 | 1.408715  |
| 146 | 6  | 0 | 8.411237   | 0.039214  | 1.387424  |
| 147 | 6  | 0 | 6.428678   | 1.534049  | 1.642669  |
| 148 | 6  | 0 | 8.163159   | -2.342984 | 1.107190  |
| 149 | 1  | 0 | 6.238698   | -3.135971 | 1.440683  |
| 150 | 6  | 0 | 9.255150   | 1.167695  | 1.451953  |
| 151 | 6  | 0 | 9.010985   | -1.214011 | 1.132042  |
| 152 | 7  | 0 | 7.299076   | 2.609194  | 1.713447  |
| 153 | 8  | 0 | 5.224302   | 1.741657  | 1.566185  |
| 154 | 6  | 0 | 8.693455   | -3.693117 | 0.799600  |
| 155 | 6  | 0 | 10.608129  | 1.028067  | 1.319824  |
| 156 | 6  | 0 | 8.697251   | 2.521906  | 1.661667  |
| 157 | 6  | 0 | 10.415222  | -1.343170 | 0.929582  |
| 158 | 6  | 0 | 6.705117   | 3.945902  | 1.722739  |
| 159 | 7  | 0 | 10.061479  | -3.789431 | 0.668109  |
| 160 | 8  | 0 | 7.956222   | -4.656984 | 0.680099  |
| 161 | 6  | 0 | 11.238254  | -0.220068 | 1.055526  |
| 162 | 1  | 0 | 11.213518  | 1.923531  | 1.390884  |
| 163 | 8  | 0 | 9.392715   | 3.510629  | 1.754705  |
| 164 | 6  | 0 | 10.948885  | -2.705896 | 0.625322  |
| 165 | 1  | 0 | 6.281113   | 4.167212  | 0.740944  |
| 166 | 1  | 0 | 5.923806   | 3.997003  | 2.480238  |
| 167 | 1  | 0 | 7.497775   | 4.653677  | 1.946764  |
| 168 | 6  | 0 | 10.623200  | -5.093636 | 0.319367  |
| 169 | 6  | 0 | 12.709405  | -0.164402 | 0.956899  |
| 170 | 8  | 0 | 12.108564  | -2.923730 | 0.347889  |
| 171 | 1  | 0 | 10.786110  | -5.148271 | -0.759121 |
| 172 | 1  | 0 | 11.575770  | -5.217954 | 0.828911  |
| 173 | 1  | 0 | 9.912336   | -5.856034 | 0.624735  |
| 174 | 6  | 0 | 13.570025  | -0.625455 | -0.001442 |
| 175 | 16 | 0 | 13.582373  | 0.760465  | 2.155693  |
| 176 | 6  | 0 | 14.919276  | -0.243866 | 0.223181  |
| 177 | 1  | 0 | 13.246069  | -1.223430 | -0.839439 |
| 178 | 6  | 0 | 15.077508  | 0.496645  | 1.354988  |
| 179 | 1  | 0 | 15.738733  | -0.522588 | -0.427263 |
| 180 | 1  | 0 | 15.992947  | 0.887738  | 1.775367  |
| 181 | 6  | 0 | -0.555079  | 3.164350  | 1.959553  |
| 182 | 6  | 0 | -0.203724  | 3.122642  | 0.572909  |
| 183 | 6  | 0 | 1.193193   | 2.978724  | 0.310413  |
| 184 | 6  | 0 | 2.102511   | 2.875972  | 1.317205  |

|     |   |   |           |          |           |
|-----|---|---|-----------|----------|-----------|
| 185 | 6 | 0 | 0.396348  | 3.074311 | 2.925514  |
| 186 | 1 | 0 | -1.586423 | 3.233060 | 2.280562  |
| 187 | 1 | 0 | 1.565585  | 2.921027 | -0.702767 |
| 188 | 1 | 0 | 3.162648  | 2.728105 | 1.142321  |
| 189 | 1 | 0 | 0.154112  | 3.110525 | 3.980320  |
| 190 | 6 | 0 | -1.168107 | 3.195573 | -0.471721 |
| 191 | 6 | 0 | -0.819543 | 3.047197 | -1.850250 |
| 192 | 6 | 0 | -2.558568 | 3.397315 | -0.218523 |
| 193 | 6 | 0 | -1.768519 | 3.111955 | -2.822185 |
| 194 | 1 | 0 | 0.197371  | 2.846762 | -2.162701 |
| 195 | 6 | 0 | -3.463632 | 3.452200 | -1.232689 |
| 196 | 1 | 0 | -2.939396 | 3.491191 | 0.788990  |
| 197 | 1 | 0 | -1.524415 | 2.990389 | -3.869851 |
| 198 | 1 | 0 | -4.525968 | 3.583451 | -1.064903 |
| 199 | 6 | 0 | 2.718339  | 2.837554 | 3.704214  |
| 200 | 1 | 0 | 2.387312  | 2.070033 | 4.408161  |
| 201 | 1 | 0 | 3.641275  | 2.477983 | 3.243729  |
| 202 | 6 | 0 | -4.087938 | 3.450924 | -3.611265 |
| 203 | 1 | 0 | -5.006263 | 2.980970 | -3.255442 |
| 204 | 1 | 0 | -3.719294 | 2.879482 | -4.465423 |
| 205 | 6 | 0 | -4.347936 | 4.889726 | -3.987395 |
| 206 | 6 | 0 | -3.517514 | 5.550683 | -4.891408 |
| 207 | 6 | 0 | -5.418625 | 5.574729 | -3.415367 |
| 208 | 6 | 0 | -3.746953 | 6.882033 | -5.212466 |
| 209 | 1 | 0 | -2.690587 | 5.020272 | -5.355944 |
| 210 | 6 | 0 | -5.648390 | 6.907503 | -3.736796 |
| 211 | 1 | 0 | -6.075285 | 5.053793 | -2.724236 |
| 212 | 6 | 0 | -4.812548 | 7.562769 | -4.633099 |
| 213 | 1 | 0 | -3.098945 | 7.387099 | -5.920859 |
| 214 | 1 | 0 | -6.485953 | 7.434037 | -3.291329 |
| 215 | 1 | 0 | -4.995049 | 8.601566 | -4.887008 |
| 216 | 6 | 0 | 2.931644  | 4.149486 | 4.423096  |
| 217 | 6 | 0 | 2.790214  | 4.221799 | 5.805908  |
| 218 | 6 | 0 | 3.296462  | 5.296951 | 3.716606  |
| 219 | 6 | 0 | 3.015328  | 5.419089 | 6.477916  |
| 220 | 1 | 0 | 2.506239  | 3.334793 | 6.365476  |
| 221 | 6 | 0 | 3.516931  | 6.493076 | 4.384789  |
| 222 | 1 | 0 | 3.400708  | 5.256572 | 2.635908  |
| 223 | 6 | 0 | 3.378058  | 6.555925 | 5.768389  |
| 224 | 1 | 0 | 2.903239  | 5.461775 | 7.556040  |
| 225 | 1 | 0 | 3.799353  | 7.379346 | 3.826466  |
| 226 | 1 | 0 | 3.552075  | 7.490902 | 6.290014  |
| 227 | 7 | 0 | -3.085983 | 3.312807 | -2.536037 |
| 228 | 7 | 0 | 1.722124  | 2.926065 | 2.627170  |
